# Supplementary material
Source: PubMed Central journal article supplement (PMC3631105)
Supplement: NIHMS407961-supplement-01.pdf [file NIHMS407961-supplement-01.pdf]

**Supplementary Table 1.** Logistic regression analysis of *CLOCK* and *CRY2* methylation levels in day workers and long-term shiftworkers.

| Methylation Tertile | Day Workers* | Shift Workers†  | Unadjusted OR (95% CI) | Unadjusted P-Value | Multivariate OR (95% CI)‡ | Multivariate P-Value‡ |
|---------------------|--------------|-----------------|------------------------|--------------------|---------------------------|-----------------------|
| <i>CLOCK</i>        |              |                 |                        |                    |                           |                       |
| Low                 | 33 (34%)     | <b>11</b> (58%) | Ref                    | -                  | Ref.                      | -                     |
| Mid                 | 33 (34%)     | 2(11%)          | <b>.18 (.04-.88)</b>   | <b>.0347</b>       | <b>.18 (.04-.87)</b>      | <b>.0333</b>          |
| High                | 32 (33%)     | 6 (32%)         | .56 (.19-1.70)         | .3084              | .56(.18-1.70)             | .3032                 |
| Mid/High            | 65 (66%)     | <b>8</b> (42%)  | .37(.14-1.01)          | .0514              | <b>.36 (.13-1.00)</b>     | <b>.0499</b>          |
| <i>CRY2</i>         |              |                 |                        |                    |                           |                       |
| High                | 25 (33%)     | <b>11</b> (61%) | Ref                    | -                  | Ref                       | -                     |
| Mid                 | 25 (33%)     | 2(11%)          | <b>.18 (.04-.91)</b>   | <b>.0374</b>       | <b>.18 (.04-.92)</b>      | <b>.0388</b>          |
| Low                 | 25 (33%)     | 5 (28%)         | .46(.14-1.50)          | .1954              | .46(.14-1.53)             | .2033                 |
| Mid/Low             | 50 (67%)     | 7 (39%)         | <b>.32 (.11-.92)</b>   | <b>.0346</b>       | <b>.32 (.11-.93)</b>      | <b>.0359</b>          |

\*0 yrs lifetime shiftwork; †10 yrs or more lifetime shiftwork; ‡Adjusted for age and total folate intake.

Note: samples from 23 workers and 1 shiftworker failed to reproducibly amplify one or more *CRY2* methylation reactions.

**Supplementary Table 2.** Top five networks identified as significantly associated with differentially methylated genes by the IPA software.

| ID | Top functions                                                                    | P-value             |
|----|----------------------------------------------------------------------------------|---------------------|
| 1  | DNA Replication, Recombination, and Repair, Cellular Compromise, Gene Expression | 1.0E <sup>-19</sup> |
| 2  | Protein Synthesis, Neurological Disease, Cellular Growth and Proliferation       | 1.0E <sup>-19</sup> |
| 3  | DNA Replication, Recombination, and Repair, Gene Expression, Behavior            | 1.0E <sup>-17</sup> |
| 4  | Gene Expression, Embryonic Development, Organismal Development                   | 1.0E <sup>-17</sup> |
| 5  | Drug Metabolism, Endocrine System Development and function, Lipid Metabolism     | 1.0E <sup>-16</sup> |

**Supplementary Figure 1.** Scatter plot of methylation indices for *CLOCK* and *CRY2* in day and long-term shiftworkers.

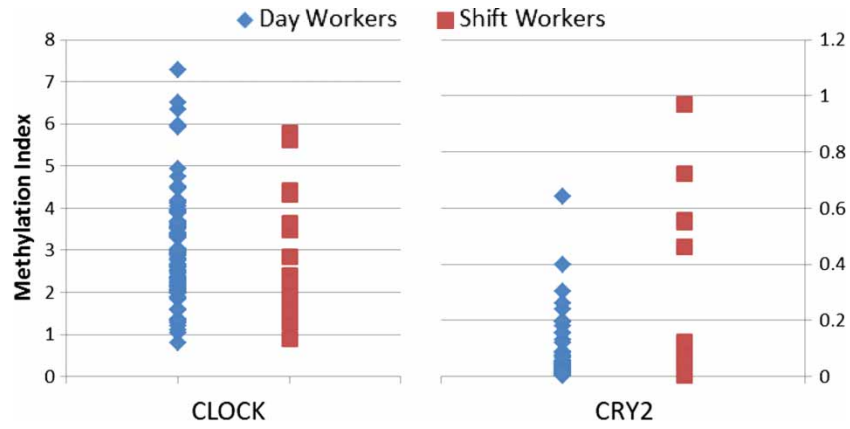

**Supplementary Figure 2.** Methylation measurement of *CLOCK*, *CRY2*, *ERCC3*, and *GTF2H2* by methylation-specific qPCR. These data showed good agreement in the magnitude of changes observed by both qPCR and the Illumina Infinium Methylation Assay. Primers of methylation-specific PCR for *CLOCK* and *CRY2* can be found in our previous publications (see Methods for references) and for *GTF2H2* and *ERCC3* are: *GTF2H2*: M.Left: 5'-TTTGTGAATTTAGTTGGAATATC-3', M.Right: 5'-CGCCTAACTAACCAACGAC-3', U.Left: 5'-TTTTGTGAATTTAGTTGGAATATT-3'U.Right: 5'-CCACCTAACTAACCAACAAC-3', *ERCC3*: M.Left: 5'-AGTAGGAGTTTT-TAGGGTTTTTTC-3', M.Right: 5'-GCTCTACCTCGAACTACTCCG-3', U.Left: 5'-GGAGTTTTTAGGGTTTTTTTT-3', U.Right: 5'-CCACTC-TACCTCAAACTACTCCA-3'.

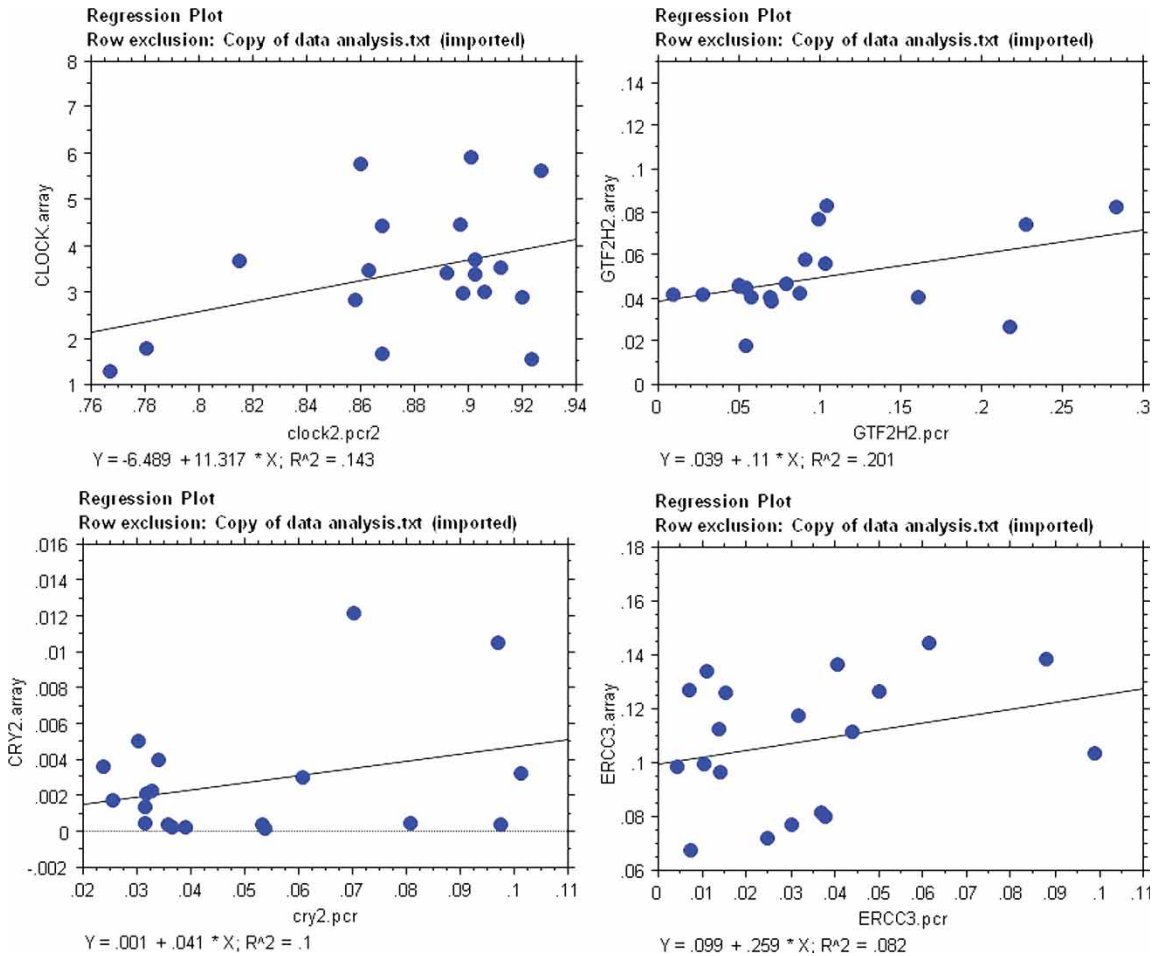

Chronobiol Int Downloaded from informahealthcare.com by Yale University on 09/14/12  
For personal use only.
